# Supplementary material
Source: MDPI journal article supplement (https://www.mdpi.com/2571-6131/7/2/37)
Supplement: s1 [file s1]

## Supplementary

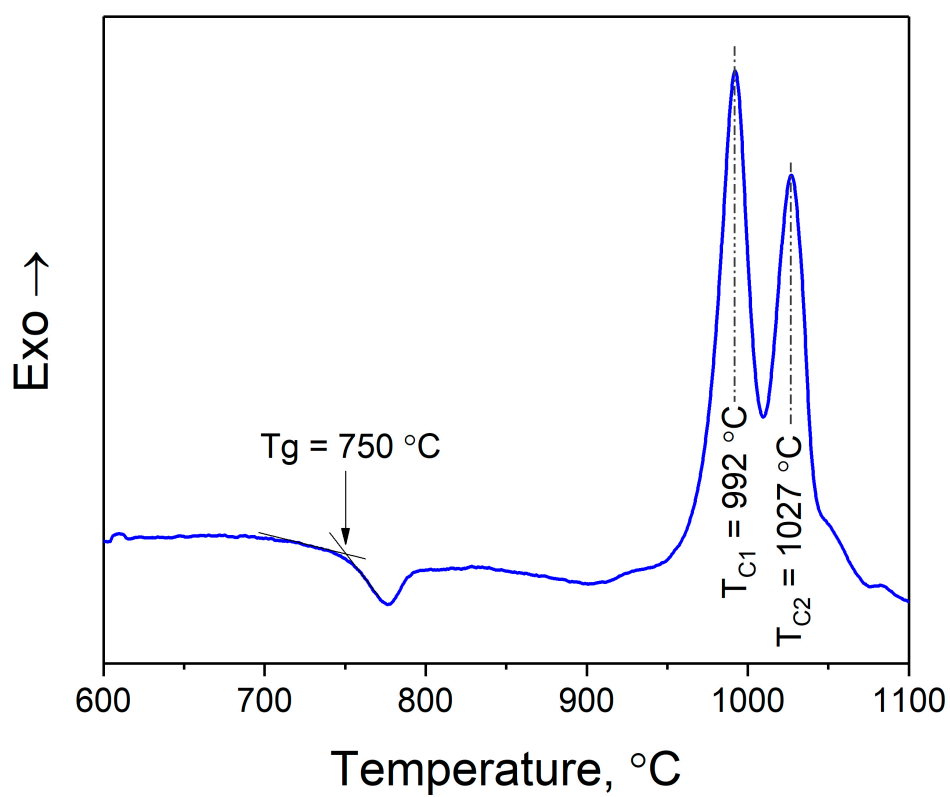

**Figure S1.** DSC curve of the synthesized glass.

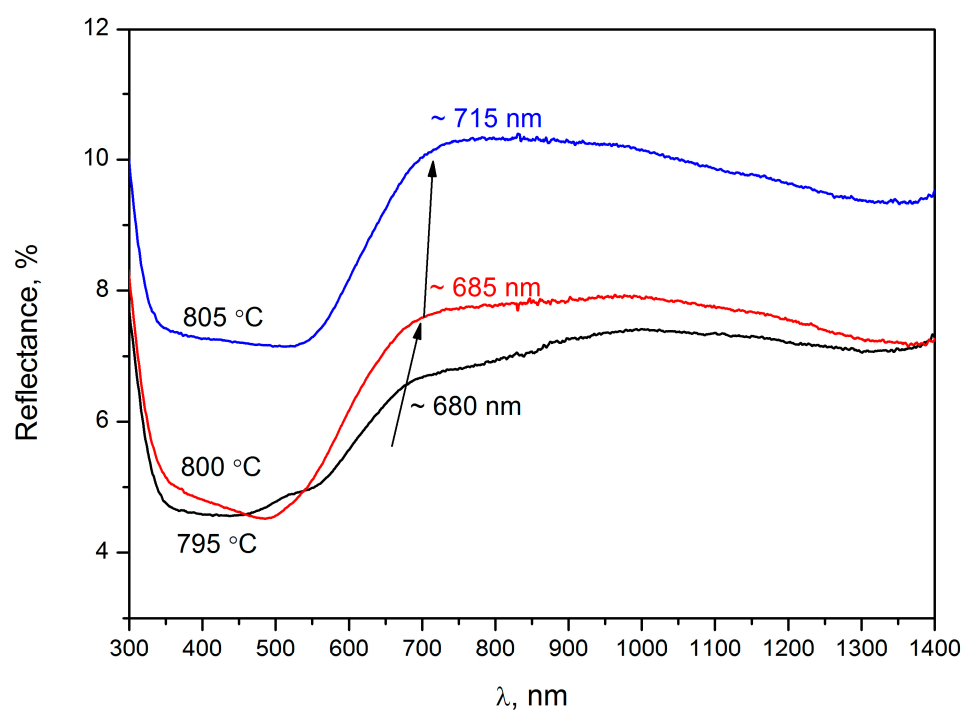

**Figure S2.** Reflectance spectra of the glass samples heat-treated for 20 h at temperatures in the 795 – 805 °C range.
